# Supplementary material for: Impact of free cancer predisposition cascade genetic testing on uptake in Singapore
Source: PubMed Central journal article supplement (PMC6744424; doi:10.1038/s41525-019-0096-5), 2019-09-13
Supplement: 41525_2019_96_MOESM1_ESM.pdf [file 41525_2019_96_MOESM1_ESM.pdf]

## SUPPLEMENTARY TABLES

**Supplementary Table 1.** Genes included in each cohort

| <b>Tier 1</b> | <b>Syndromic</b> | <b>Emerging Evidence</b> |
|---------------|------------------|--------------------------|
| <i>BRCA1</i>  | <i>APC</i>       | <i>ATM</i>               |
| <i>BRCA2</i>  | <i>CDH1</i>      | <i>BARD1</i>             |
| <i>MLH1</i>   | <i>CDKN2A</i>    | <i>BRIP1</i>             |
| <i>MSH2</i>   | <i>GATA1</i>     | <i>CHEK2</i>             |
| <i>MSH6</i>   | <i>MEN1</i>      | <i>MAX</i>               |
| <i>PMS2</i>   | <i>NF1</i>       | <i>NBN</i>               |
|               | <i>PTEN</i>      | <i>PALB2</i>             |
|               | <i>RB1</i>       | <i>RAD51D</i>            |
|               | <i>RET</i>       |                          |
|               | <i>SDHA</i>      |                          |
|               | <i>SDHB</i>      |                          |
|               | <i>SDHD</i>      |                          |
|               | <i>SMARCB1</i>   |                          |
|               | <i>STK11</i>     |                          |
|               | <i>TERC</i>      |                          |
|               | <i>TERT</i>      |                          |
|               | <i>TP53</i>      |                          |
|               | <i>TSC1</i>      |                          |
|               | <i>TSC2</i>      |                          |
|               | <i>VHL</i>       |                          |
